# Supplementary material for: CURATE.AI COR-Tx platform as a digital therapy and digital diagnostic for cognitive function in patients with brain tumour postradiotherapy treatment: protocol for a prospective mixed-methods feasibility clinical trial
Source: PubMed Central journal article supplement — BMJ Open. 2023 Oct 25;13(10):e077219. doi: 10.1136/bmjopen-2023-077219 (PMC10603439; doi:10.1136/bmjopen-2023-077219), 2023-10-25
Supplement: bmjopen-2023-077219.reviewer_comments.pdf [file bmjopen-2023-077219.reviewer_comments.pdf]

## PEER REVIEW HISTORY

BMJ Open publishes all reviews undertaken for accepted manuscripts. Reviewers are asked to complete a checklist review form (<http://bmjopen.bmj.com/site/about/resources/checklist.pdf>) and are provided with free text boxes to elaborate on their assessment. These free text comments are reproduced below.

### ARTICLE DETAILS

|                            |                                                                                                                                                                                                                                                                                                                              |
|----------------------------|------------------------------------------------------------------------------------------------------------------------------------------------------------------------------------------------------------------------------------------------------------------------------------------------------------------------------|
| <b>TITLE (PROVISIONAL)</b> | CURATE.AI COR-Tx platform as a digital therapy and digital diagnostic for cognitive function in brain tumour patients post-radiotherapy treatment: Protocol for a prospective mixed-methods feasibility clinical trial                                                                                                       |
| <b>AUTHORS</b>             | Remus, Alexandria; Tadeo, Xavier; Kai, Grady Ng Shi; Blasiak, Agata; Kee, Theodore; Vijayakumar, Smrithi; Nguyen, Le; Raczowska, Marlena; Chai, Qian Yee; Aliyah, Fatin; Rusalovski, Yaromir; Jia, Teo Ke; Yeo, Tseng Tsai; WONG, Andrea Li Ann; Chia, David; Asplund, Christopher L.; Ho, Dean; Vellayappan, Balamurugan A. |

### VERSION 1 – REVIEW

|                        |                                                                                  |
|------------------------|----------------------------------------------------------------------------------|
| <b>REVIEWER</b>        | Gameiro-Santos, Rita<br>Centro Hospitalar Barreiro Montijo EPE, Medical Oncology |
| <b>REVIEW RETURNED</b> | 31-Aug-2023                                                                      |

|                         |                                                                                                                                                                                                   |
|-------------------------|---------------------------------------------------------------------------------------------------------------------------------------------------------------------------------------------------|
| <b>GENERAL COMMENTS</b> | Very clear protocol. Very interesting. Software already validated in other themes. Relevant area lacking therapeutic options. Small study but it is good to start and to structure future trials. |
|-------------------------|---------------------------------------------------------------------------------------------------------------------------------------------------------------------------------------------------|

|                        |                                                                                |
|------------------------|--------------------------------------------------------------------------------|
| <b>REVIEWER</b>        | Shiba, Satoshi<br>National Cancer Center Hospital, Outpatient Treatment Center |
| <b>REVIEW RETURNED</b> | 18-Sep-2023                                                                    |

|                         |                                                                                                                                                                                                                                                                                                                                                                                                                                                                                                                                                                                                                                                                                                                                                                                                                                                                                                                                                                                                           |
|-------------------------|-----------------------------------------------------------------------------------------------------------------------------------------------------------------------------------------------------------------------------------------------------------------------------------------------------------------------------------------------------------------------------------------------------------------------------------------------------------------------------------------------------------------------------------------------------------------------------------------------------------------------------------------------------------------------------------------------------------------------------------------------------------------------------------------------------------------------------------------------------------------------------------------------------------------------------------------------------------------------------------------------------------|
| <b>GENERAL COMMENTS</b> | <p>This study protocol is well-designed and investigated appropriately to proceed next study phase. So I hope that the present research will go well and look forward to the result in the future.</p> <p>However, there is only one concern about eligibility criteria, namely patient participants.</p> <p>Although the authors regulate study participants using inclusion and exclusion criteria, it is assumed that characteristics and backgrounds of participants will be exceedingly various, which depend on pathologic diagnosis, tumor grading, surgical methods and the brain part of surgical resection. As a result, it may be difficult to decide eligibility criteria when the authors consider participants in the next step, multi-centered RCT study. Its concern is ineluctable because of the nature of a feasibility study. The authors mentioned the limitations including unexpected issues and they could cope with those problems adequately in designing a next RCT study.</p> |
|-------------------------|-----------------------------------------------------------------------------------------------------------------------------------------------------------------------------------------------------------------------------------------------------------------------------------------------------------------------------------------------------------------------------------------------------------------------------------------------------------------------------------------------------------------------------------------------------------------------------------------------------------------------------------------------------------------------------------------------------------------------------------------------------------------------------------------------------------------------------------------------------------------------------------------------------------------------------------------------------------------------------------------------------------|

## VERSION 1 – AUTHOR RESPONSE

Reviewer: 1

Dr. Rita Gameiro-Santos, Centro Hospitalar Barreiro Montijo EPE

Comments to the Author:

Very clear protocol. Very interesting. Software already validated in other themes. Relevant area lacking therapeutic options. Small study but it is good to start and to structure future trials.

Thank you for your comments. We appreciate your understanding in the appropriateness of the small study to inform future trials.

Reviewer: 2

Dr. Satoshi Shiba, National Cancer Center Hospital

Comments to the Author:

This study protocol is well-designed and investigated appropriately to proceed next study phase. So I hope that the present research will go well and look forward to the result in the future.

However, there is only one concern about eligibility criteria, namely patient participants.

Although the authors regulate study participants using inclusion and exclusion criteria, it is assumed that characteristics and backgrounds of participants will be exceedingly various, which depend on pathologic diagnosis, tumor grading, surgical methods and the brain part of surgical resection. As a result, it may be difficult to decide eligibility criteria when the authors consider participants in the next step, multi-centered RCT study. Its concern is ineluctable because of the nature of a feasibility study. The authors mentioned the limitations including unexpected issues and they could cope with those problems adequately in designing a next RCT study.

Thank you for your comments. We agree with your comment and have included reference to the concerns about future trial eligibility criteria into the limitations bullet point. This now reads “The non-randomised single-arm feasibility trial does not simulate a randomised control trial as closely as a randomised pilot and is limited in informing on issues that may arise from the logistical process on a larger scale, including future decisions on determining eligibility criteria from a diverse patient population.”
