# Supplementary material for: CURATE.AI COR-Tx platform as a digital therapy and digital diagnostic for cognitive function in patients with brain tumour postradiotherapy treatment: protocol for a prospective mixed-methods feasibility clinical trial
Source: PubMed Central journal article supplement — BMJ Open. 2023 Oct 25;13(10):e077219. doi: 10.1136/bmjopen-2023-077219 (PMC10603439; doi:10.1136/bmjopen-2023-077219), 2023-10-25
Supplement: bmjopen-2023-077219supp002.pdf [file bmjopen-2023-077219supp002.pdf]

## Voluntary Interview Guide

### Demographic Details

- Age
- Gender
- Education
- Occupation
- Clinical status

### Theme 1: Project objective (Why the choice?)

- Could you tell us why you decided to participate in the study?
- What are you trying to achieve/what are your expectations?
- What are some alternatives you may try instead of this? And why?
- What do you feel about the interface/intervention?
- What were you looking for when you were informed of such a project?
- What do you feel about the instructions?
- Could you comment on this method of training/evaluation?
- Do you think it's appropriate to be randomised into a control group in a future clinical trial?

### Theme 2: Overall experience (What facilitates and what hinders?)

- What do you like about the interface/intervention?
- What don't you like?
- Is there something you've done previously that's similar?
- Would you know anyone who might enjoy this interface?- Could you describe those people?
- What is your opinion on the time taken- Overall, task wise?
- What are your thoughts about the doctor's absence in this?
- How confident do you feel using the interface?
- Did you face difficulties? Could you elaborate?
- What was easy in do in this?
- What is good about this? What isn't?
- Would you voluntarily do it?
- Is this something you would like as part of your formal treatment?
- How would you like to use it- the medium, ideas on the interface?
- Do you think there were or there could be any adverse events in this?

### Theme 3: Training (How do you help people to use the interface?)

- What did you learn?
- How did it help?
- What could have been better?
- How was the explanation/instructions?

Interview Guide, Version 2.0, Dated 6/10/2022
